# Supplementary material
Source: PubMed Central journal article supplement (PMC11072760)
Supplement: 18_2022_4215_MOESM1_ESM.pdf [file 18_2022_4215_MOESM1_ESM.pdf]

**Figure S1****A**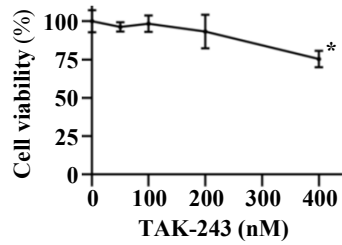**B**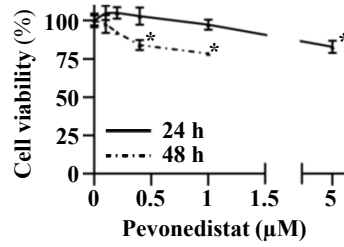**C**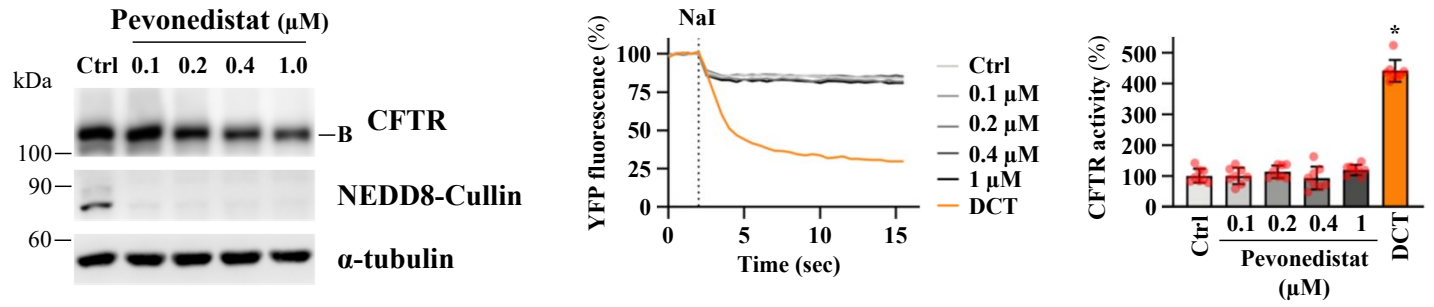**D**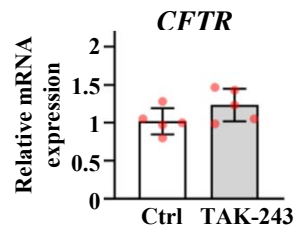**E**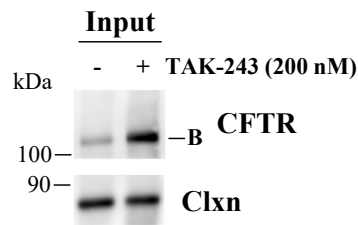

**Fig. S1. (A)** The viability of F508del-CFTR expressing CFBE41o- cells was assessed by the MTT assay after 24 h treatment with increasing concentrations (25, 50, 100, 200, or 400 nM) of TAK-243 and expressed as a percentage of control (means  $\pm$  SD values,  $n = 5$  (A),  $n = 3$  (B);  $*p < 0.05$  vs control). **(B)** The viability of F508del-CFTR expressing CFBE41o- cells was assessed by the MTT assay after 24 h treatment with increasing concentrations of Pevonedistat after 24 and 48 h treatment with increasing concentrations (0.1, 0.2, 0.4, 1, 5  $\mu$ M for 24 h; 0.1, 0.2, 0.4, 1  $\mu$ M for 48 h) and expressed as a percentage of control. (means  $\pm$  SD values,  $n = 5$  (A),  $n = 3$  (B);  $*p < 0.05$  vs control). **(C)** Immunoblot analysis of CFTR and NEDD8-Cullin in whole lysates from F508del-CFTR expressing CFBE41o- cells treated with DMSO (Ctrl) or increasing concentrations of Pevonedistat for 48 h.  $\alpha$ -tubulin was used as loading control ( $n = 3$ ) (left panel). Assessment of F508del-CFTR activity was carried out by HS-YFP assay in F508del-CFTR expressing CFBE41o- cells treated as indicated above or with double corrector treatment (DCT = 10  $\mu$ M VX-661 + 3  $\mu$ M VX-445) for 24 h. Centre panel exhibits representative traces measuring YFP quenching ( $n = 4$ ), right panel shows the CFTR activity as a percentage of control (Scr) (means  $\pm$  SD values,  $n = 8$ ;  $*p < 0.05$  vs Ctrl). **(D)** CFTR mRNA level determined by quantitative real-time PCR in F508del-CFTR expressing CFBE41o- cells were treated with DMSO (Ctrl) or TAK-243 (200 nM) for 24 h. CFTR mRNA expression was normalized to 18S RNA and reported relative to its expression in Ctrl cells that was arbitrarily set to 1 (means  $\pm$  SD values,  $n = 5$ ). **(E)** F508del-CFTR expressing CFBE41o- cells were treated with DMSO or 200 nM TAK-243 for 24 h, lysed and analysed by western blot with anti-CFTR antibody. Calnexin (Clxn) was used as a loading control. The lysates were used for the immunoprecipitation experiments of Fig. 2D.

**Figure S2****A**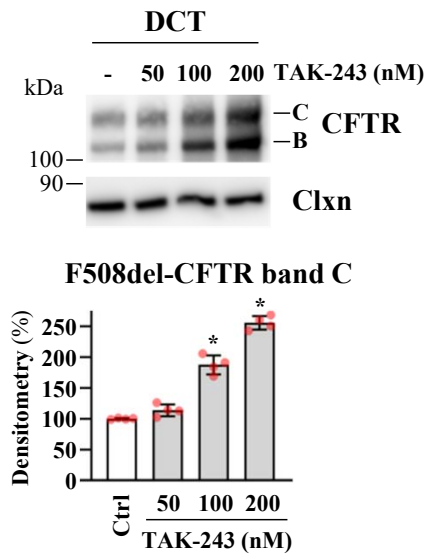**B**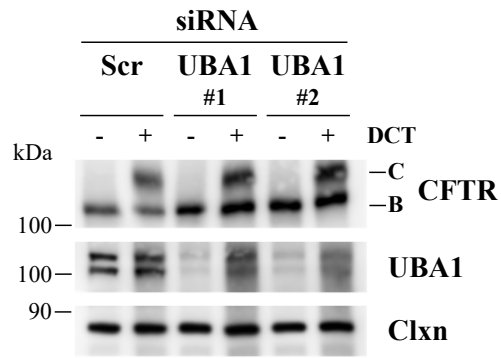**C**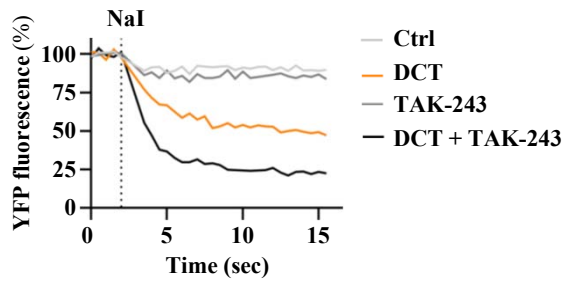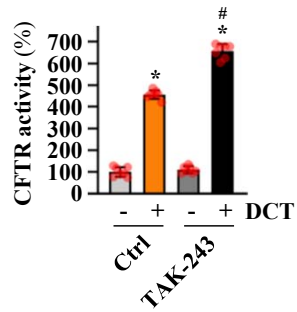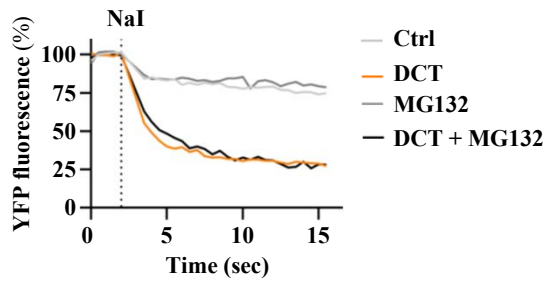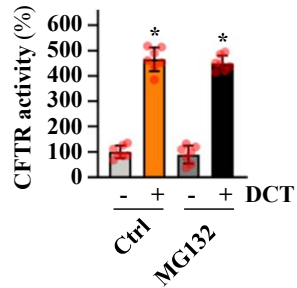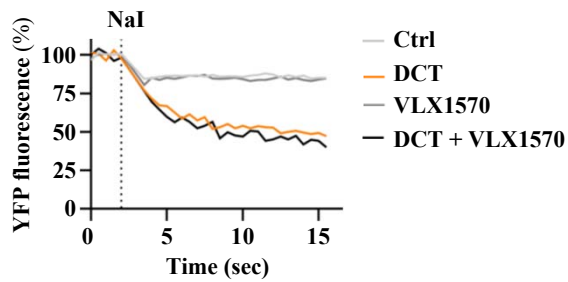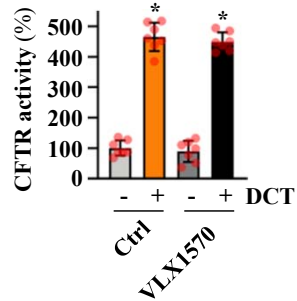

**Fig. S2. (A)** Immunoblot analysis of CFTR in whole lysates from F508del-CFTR expressing CFBE41o- cells treated with increasing concentrations of TAK-243 (50, 100, 200 nM) in combination with double corrector treatment (DCT = 10  $\mu$ M VX-661 + 3  $\mu$ M VX-445) for 24 h. Calnexin (Clxn) was used as a loading control. The figure panel is representative of four independent experiments. Lower panel shows the densitometric quantification of the immunostained F508del-CFTR band C. The values for CFTR band C are expressed as a percentage of the control cells (means  $\pm$  SD values,  $n = 4$ ;  $*p < 0.05$  vs Ctrl). **(B)** F508del-CFTR expressing CFBE41o- cells were transfected with non-specific siRNA (Scr), or two different UBA1 specific siRNAs. After 24 h post-transfection cells were treated with DCT (10  $\mu$ M VX-661 + 3  $\mu$ M VX-445) for further 24 and lysed. Lysate proteins were analysed by western blot with the indicated antibodies. Calnexin (Clxn) was used as a loading control. The figure panel is representative of three independent experiments. **(C)** Assessment of F508del-CFTR activity was carried out by HS-YFP assay in F508del-CFTR expressing CFBE41o- cells treated with DMSO (Ctrl) or TAK-243 (200 nM) or MG132 (1  $\mu$ M) or VLX1570 (250 nM) in combination (+) or not (-) with double corrector treatment (DCT = 10  $\mu$ M VX-661 + 3  $\mu$ M VX-445) for 24 h. Left panels exhibit representative traces measuring YFP quenching, right panels show the CFTR activity as a percentage of control cells not treated with DCT (Ctrl) (means  $\pm$  SD values,  $n = 7$ ;  $*p < 0.05$  vs Ctrl,  $\#p < 0.05$  vs Ctrl with DCT).



**Fig. S3. (A)** 300  $\mu$ g of lysate proteins from F508del-CFTR expressing CFBE41o- cells untreated (Ctrl) or grew for at least 1 month in presence of TAK-243 (10 nM) were immunoprecipitated with a control antibody from the same class (Ctrl) or anti-CFTR (CFTR) antibody. The immunocomplexes were analysed by western blot with the indicated antibodies (left panel). The figure panel is representative of four independent experiments. A long exposition of CFTR detection is also shown (i.e.: long exposition). The central panels show representative density profiles of CFTR and ubiquitin in the CFTR-immunoprecipitated samples. Quantification of the density profiles was performed in the right panels by integrating the profile curves in the indicated intervals of molecular weight (Ubiquitin: 220-350 kDa; Ub-CFTR: 220-350 kDa; CFTR band B: 130-150 kDa) (means  $\pm$  SD;  $n = 4$ ;  $*p < 0.05$  vs Ctrl). **(B)** Nuclear staining (Hoechst) of F508del-CFTR expressing CFBE41o- cells chronically treated (at least 1 months) with DMSO (Ctrl) or TAK-243 (10 nM) magnification 20 $\times$ . **(C)** Cell cycle analysis analysis by flow cytometry of F508del-CFTR expressing CFBE41o- cells chronically treated (at least 1 months) with DMSO (Ctrl) or TAK-243 (10 nM). On the right histogram data of the cell cycle analysis (means  $\pm$  SD values,  $n = 3$ ). **(D)** Densitometric quantification of the immunoblots of Fig. 4E. The values are expressed as a percentage of the control cells (dashed line) (means  $\pm$  SD values,  $n = 4$ ;  $*p < 0.05$  vs Ctrl;  $\#p < 0.05$  vs chronic treated cells).
